# Supplementary material for: Modulation of acetylcholinesterase activity using molecularly imprinted polymer nanoparticles
Source: Royal Society of Chemistry journal article supplement (doi:10.1039/d2tb00278g), 2022-01-01
Supplement: d2tb00278g1.pdf [file d2tb00278g1.pdf]

## Modulation of Acetylcholinesterase Activity Using Molecularly Imprinted Polymer Nanoparticles

Sergey Piletsky, Thomas S Bedwell, Rachele Paoletti, Kal Karim, Francesco Canfarotta, Rachel Norman,  
Donald J L Jones, Nicholas W Turner and Elena Piletska

Correspondence to: Elena Piletska (ep219@le.ac.uk)

### This PDF file includes:

#### Supplementary Figures

**Fig. S1.** Solid phase synthesis of MIP nanoparticles.

**Fig. S2.** Size distribution by intensity (top) and correlograms (bottom) for YWA-MIPs synthesized in this work

**Fig. S3.** Size distribution by intensity (top) and correlograms (bottom) for FRF-MIPs synthesized in this work

**Fig. S4.** Size distribution by intensity (top) and correlograms (bottom) for LAL-MIPs synthesized in this work

**Fig. S5.** Size distribution by intensity (top) and correlograms (bottom) for FGE-MIPs synthesized in this work

**Fig. S6.** Typical TEM image of the YWANFAR-specific MIP NPs specific for AChE.

**Fig. S7.** SPR sensorgrams showing response of YWA-MIPs to injections of different concentrations of AChE.

**Fig. S8.** SPR sensorgrams showing response of FGE-MIPs to injections of different concentrations of AChE.

**Fig. S9.** SPR sensorgrams showing response of FRF-MIPs to injections of different concentrations of AChE.

**Fig. S10.** SPR sensorgrams showing response of LAL-MIPs to injections of different concentrations of AChE.

**Fig. S11.** Direct measure of substrate conversion by enzyme alone and in the presence of FRF-MIP.

**Fig. S12.** Circular dichroism spectra of AChE with increasing concentration of YWA-MIP.

**Fig. S13.** Michaelis-Menten plot obtained for FRF-MIP.

#### Supplementary Data Tables

**Table S1:** Size values and distribution for the nanoMIPs measured using DLS.

**Table S2.** Affinity coefficient ( $K_D$ ) of the synthesized MIP nanoparticles upon interaction with EeAChE enzyme measured using SPR.

**Table S3.** Values obtained from Michaelis-Menten plot for FRF-MIP.

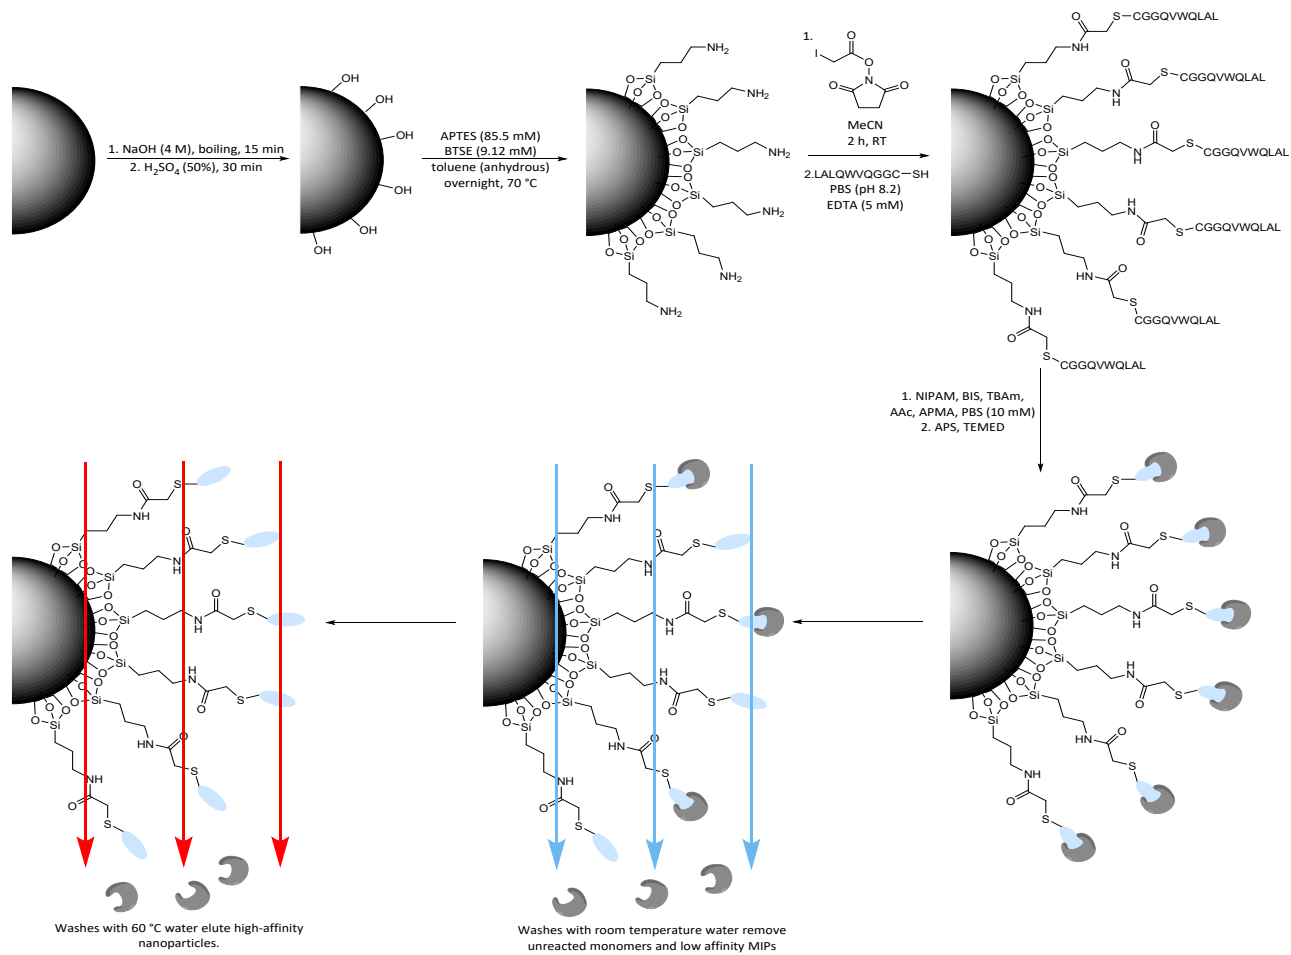

**Fig. S1.** Solid phase synthesis of MIP nanoparticles.

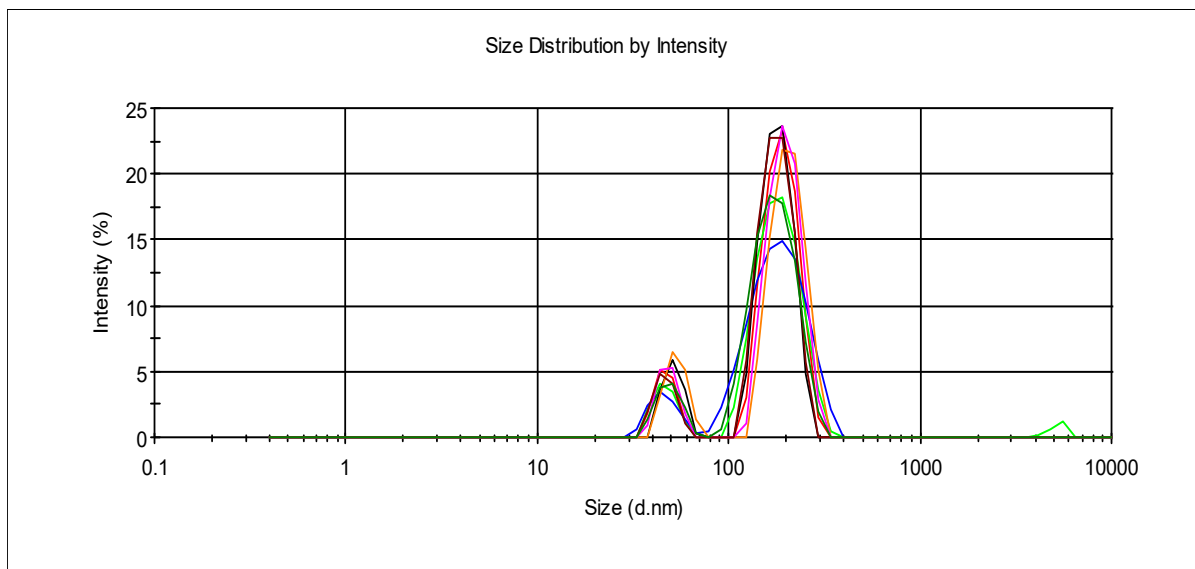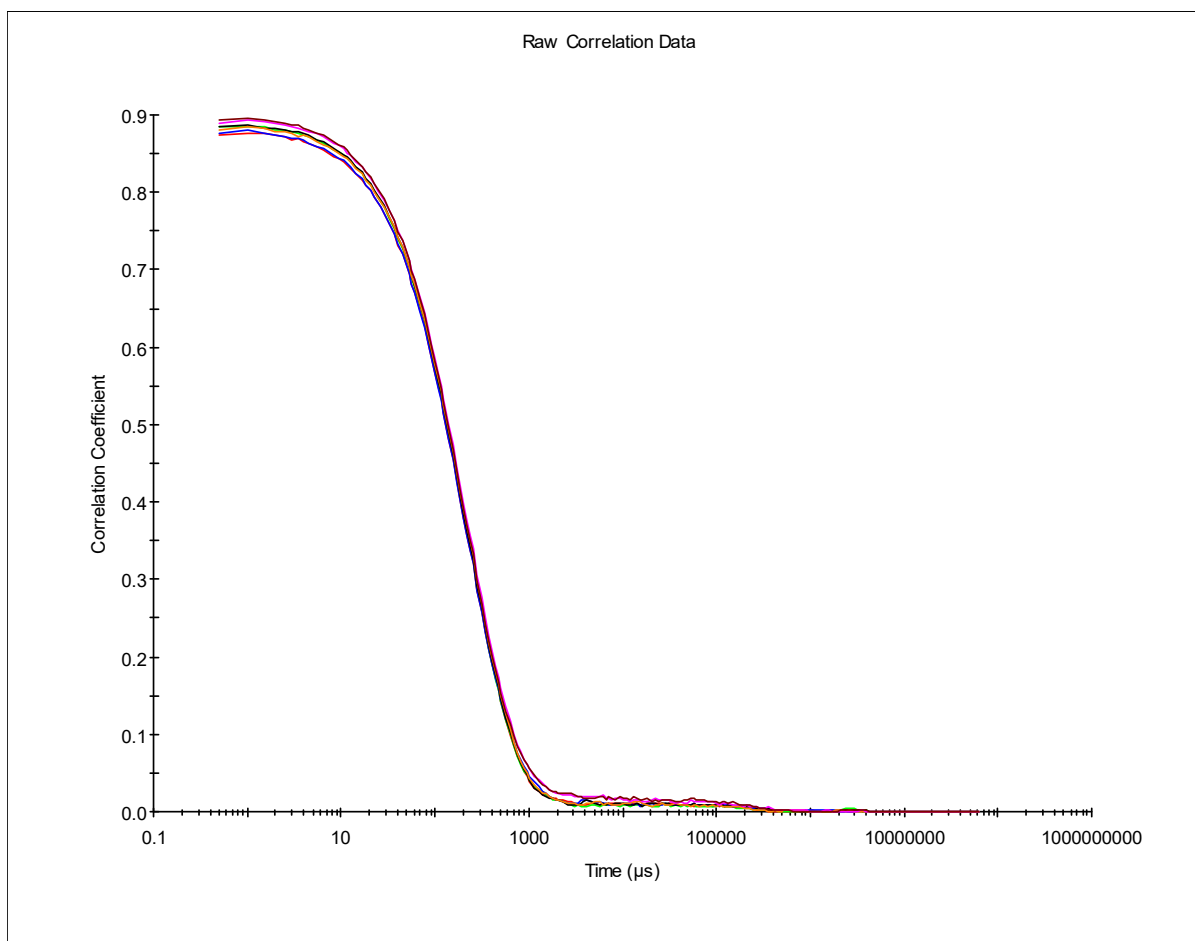

**Fig. S2.** Size distribution by intensity (top) and correlograms (bottom) for YWA-MIPs synthesized in this work (for the size and distribution values, see Table S1).

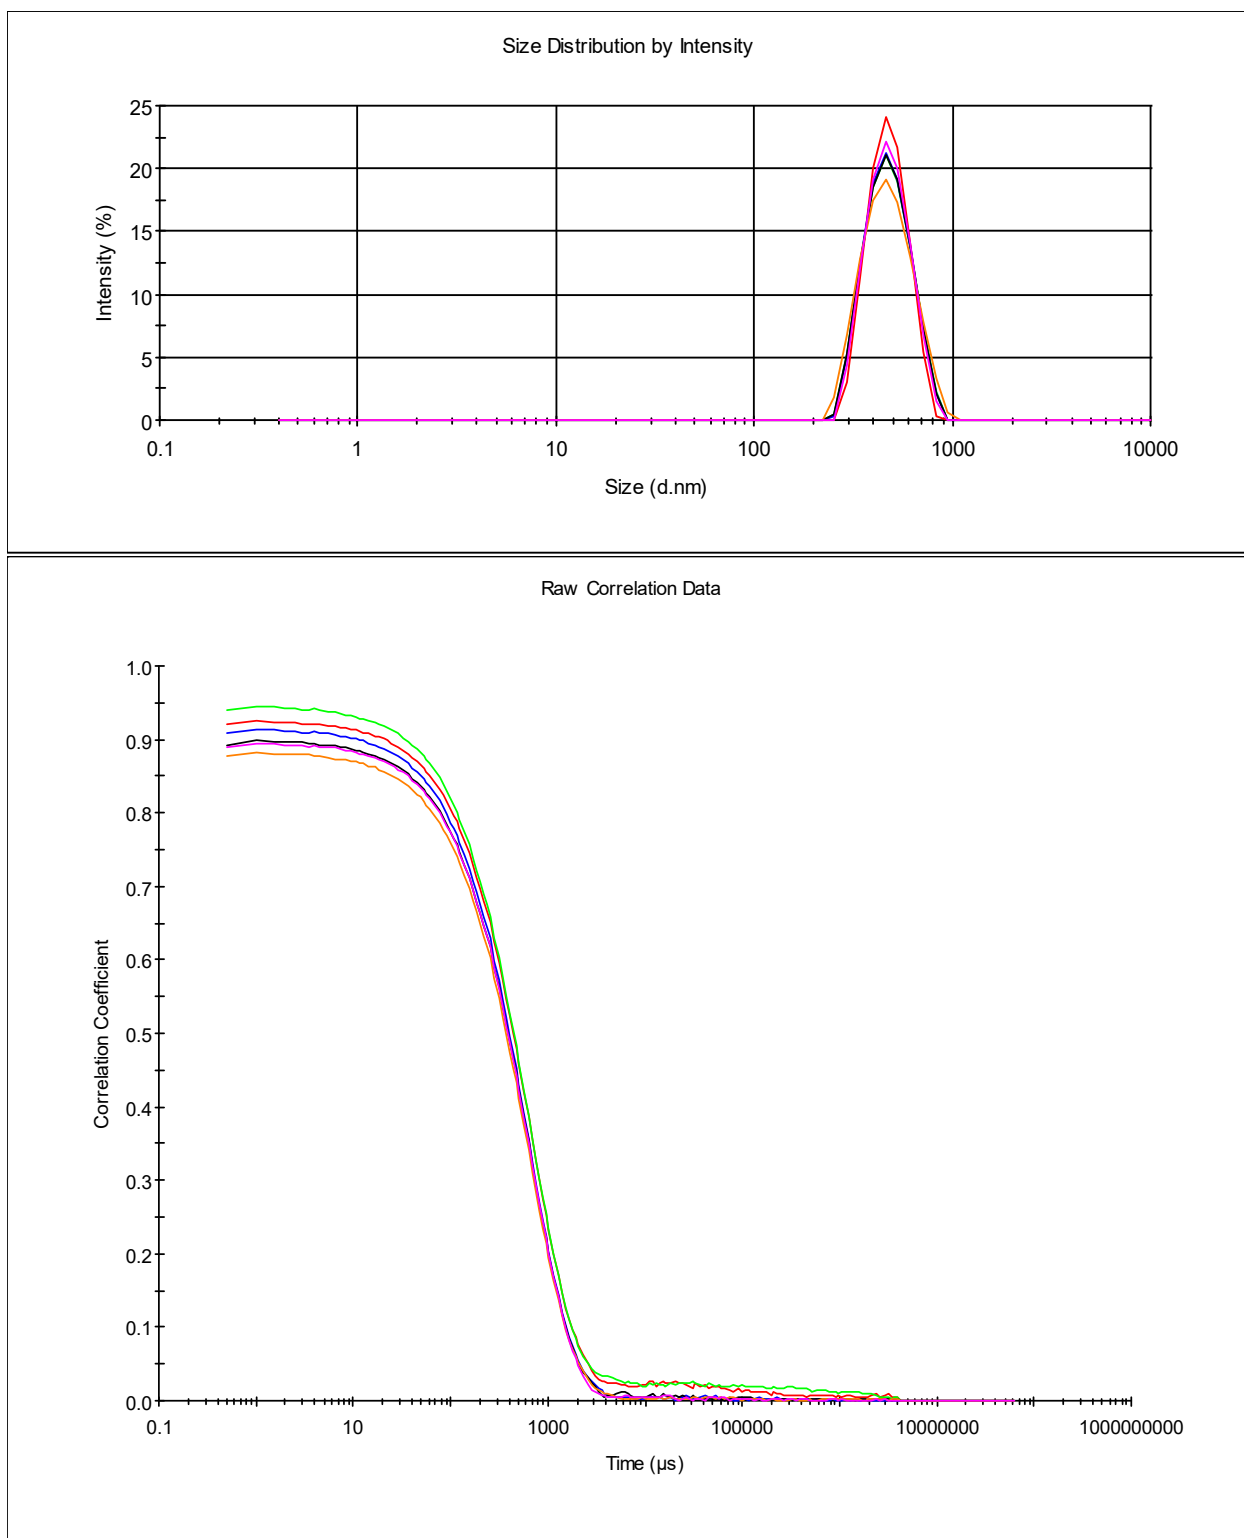

**Fig. S3.** Size distribution by intensity (top) and correlograms (bottom) for FRF-MIPs synthesized in this work (for the size and distribution values, see Table S1).

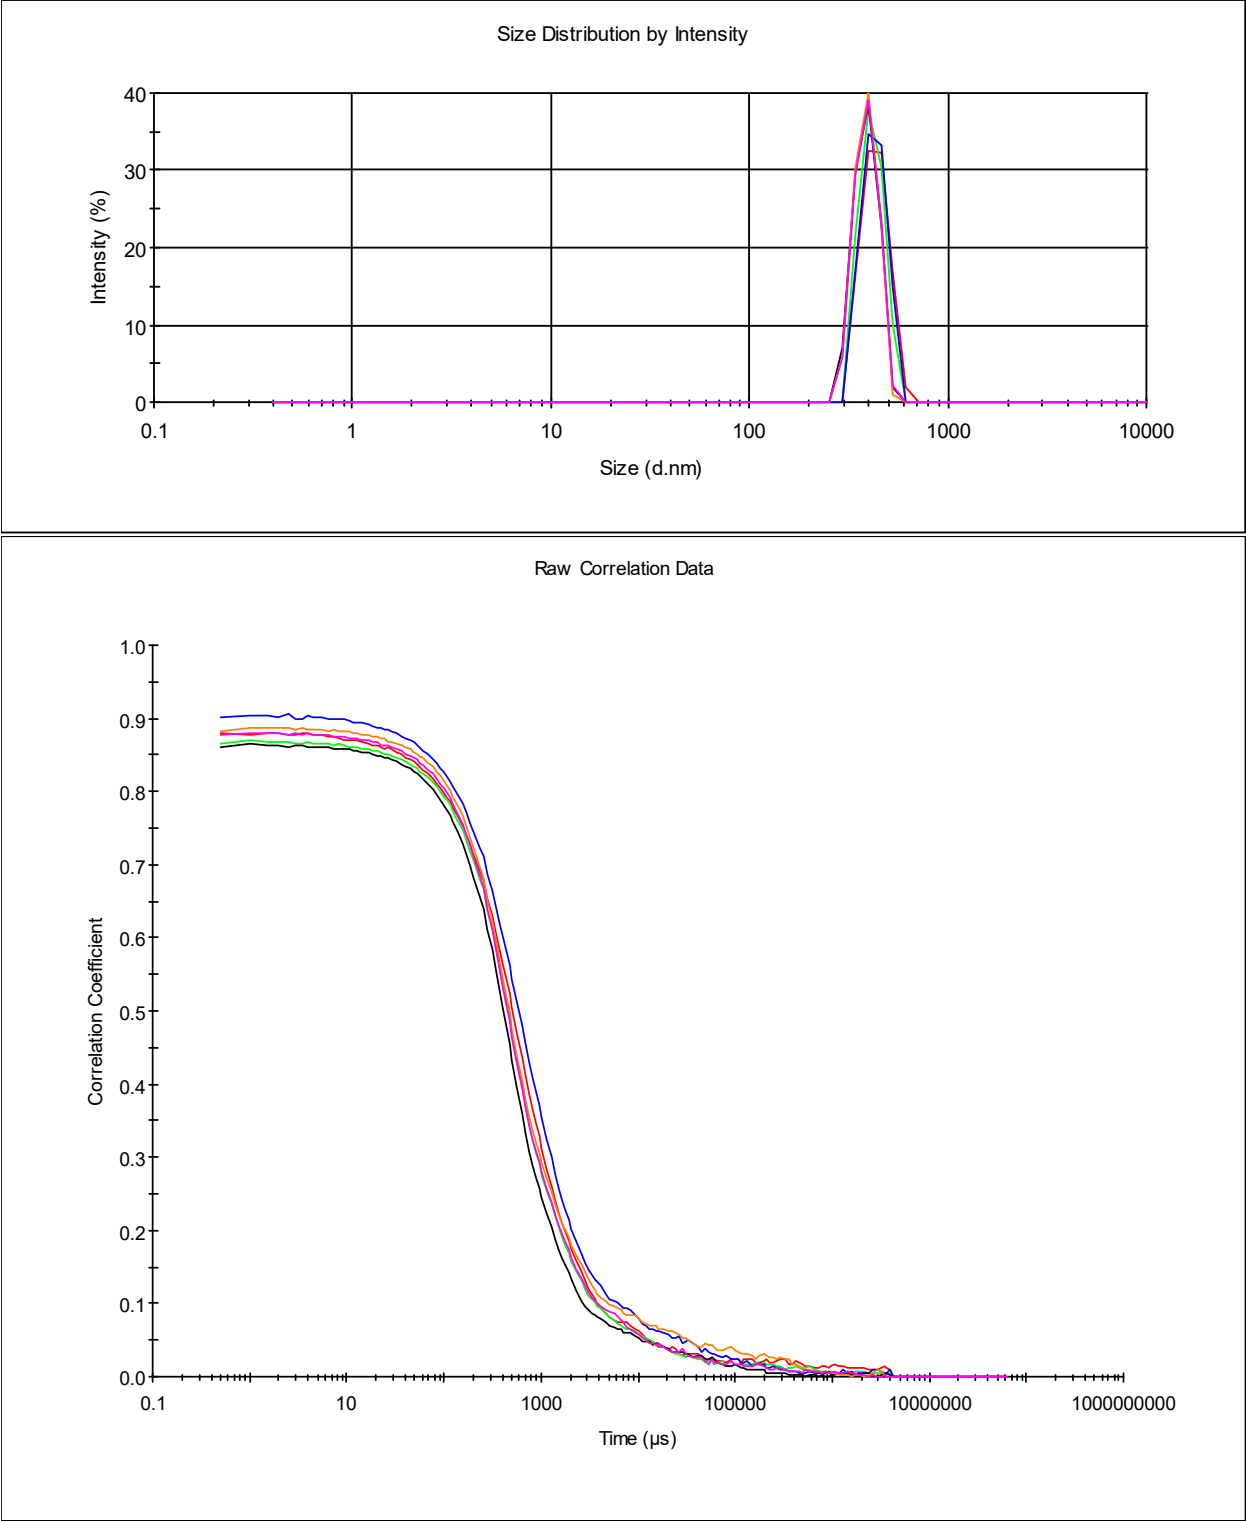

**Fig. S4.** Size distribution by intensity (top) and correlograms (bottom) for LAL-MIPs synthesized in this work (for the size and distribution values, see Table S1).

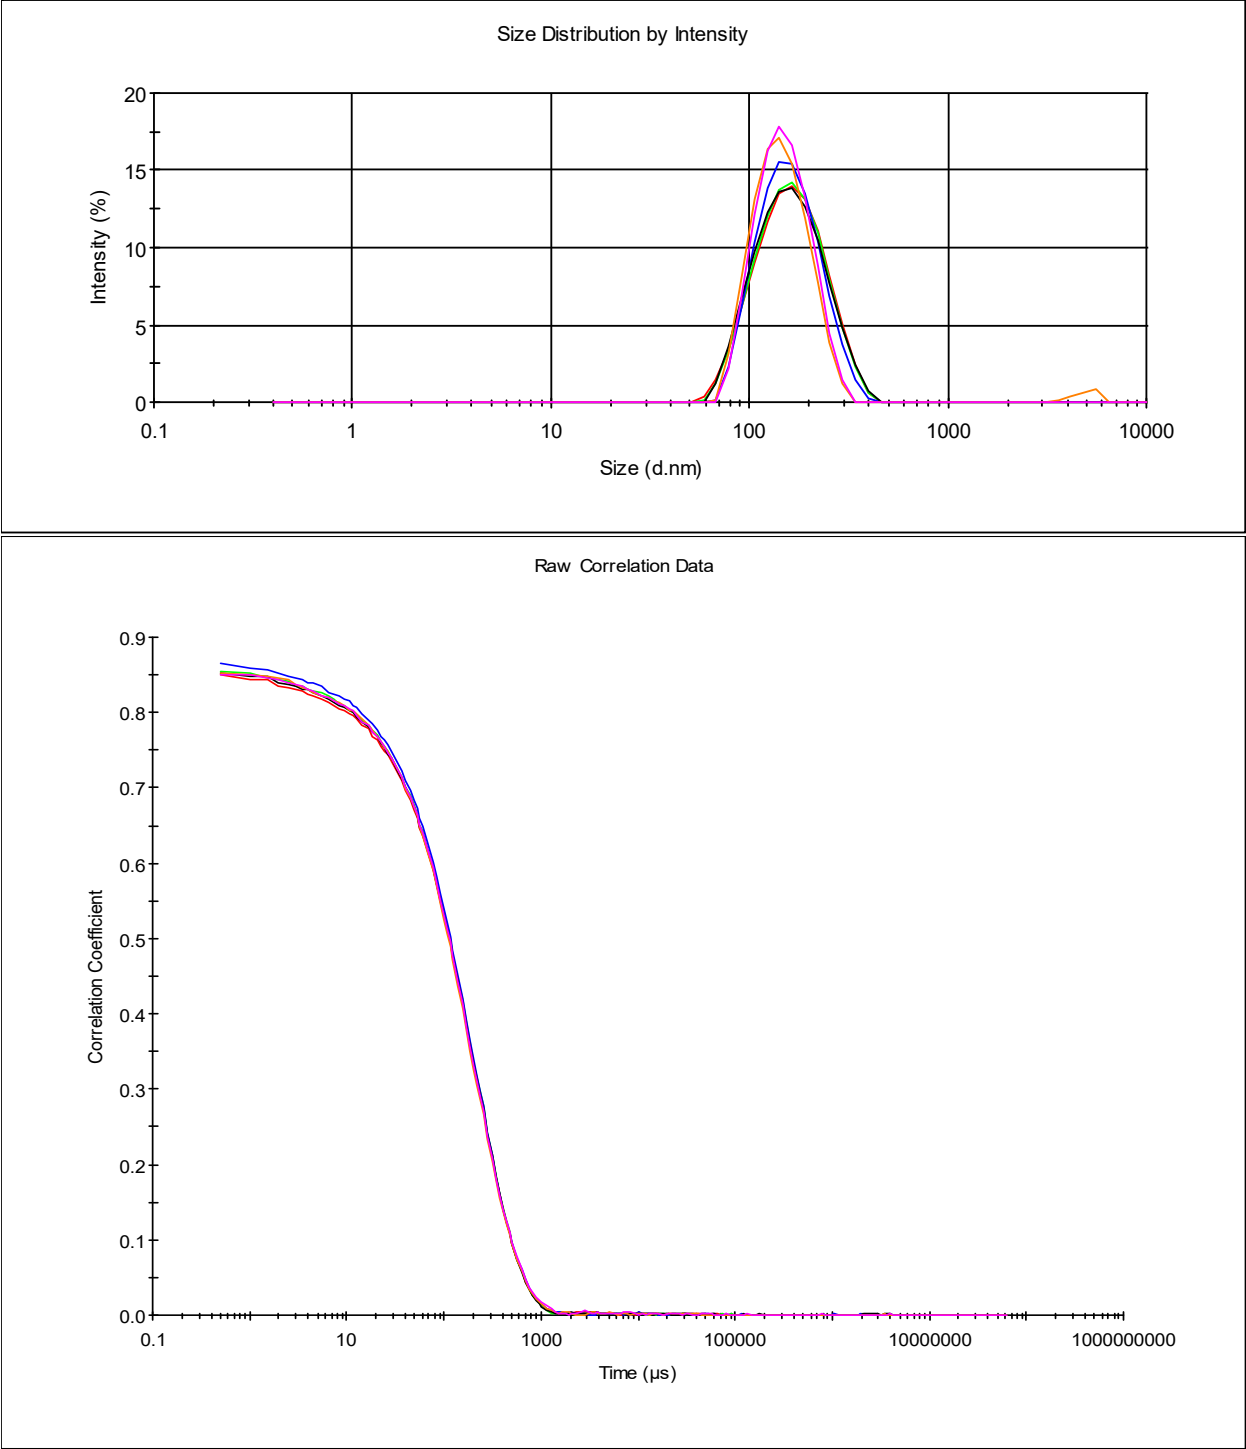

**Fig. S5.** Size distribution by intensity (top) and correlograms (bottom) for FGE-MIPs synthesized in this work (for the size and distribution values, see Table S1).

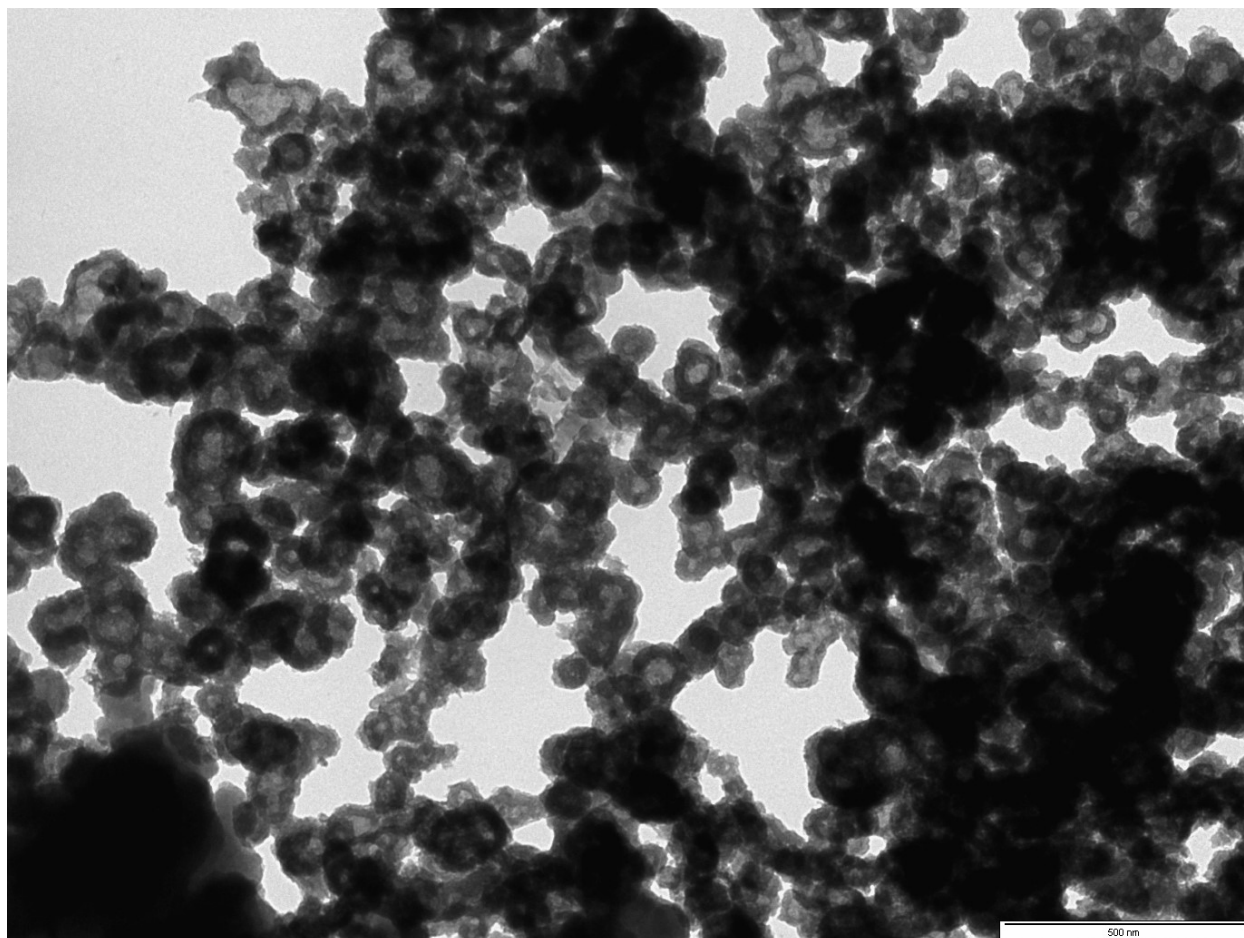

**Fig. S6.** Typical TEM image of the YWANFAR-specific MIP NPs specific for AChE.

**Table S1:** Size values and distribution for the nanoMIPs measured using DLS.

| <b>MIP</b> | <b>Size by intensity (d. nm)</b> | <b>Pdi</b>    | <b>Number mean (d. nm)</b> |
|------------|----------------------------------|---------------|----------------------------|
| LAL        | 408.4 ± 20.52                    | 0.439 ± 0.056 | 393.6 ± 18.87              |
| YWA        | 189.5 ± 10.52                    | 0.304 ± 0.032 | 44.81 ± 2.86               |
| FRF        | 484.3 ± 1.818                    | 0.102 ± 0.047 | 431.1 ± 7.04               |
| FGE        | 163.5 ± 9.381                    | 0.140 ± 0.016 | 101.5 ± 6.76               |

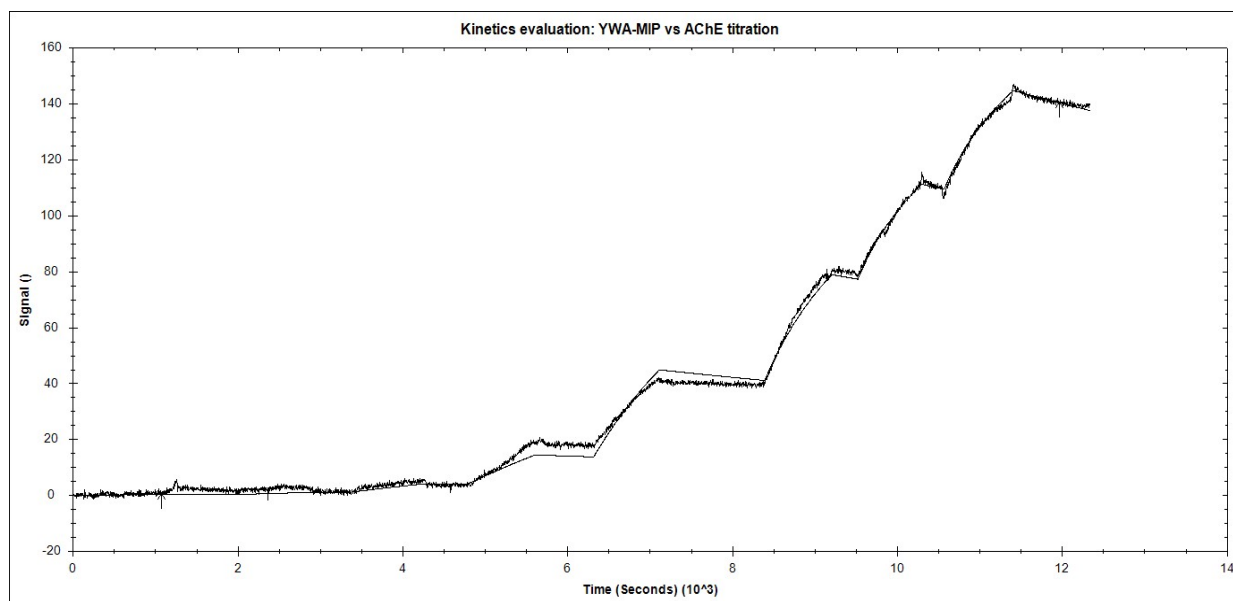

**Fig. S7.** SPR sensorgrams showing response of YWA-MIPs to injections of different concentrations of AChE. A kinetic titration injection strategy was employed for these experiments due to the difficulty of surface regeneration. AChE was injected at 5 different concentrations from 0.1 nM to 1  $\mu$ M and allowed to associate and dissociate for 14 min and 5 min respectively, before a final dissociation of 120 min (not shown). All data were reference subtracted against a control polymer of the same monomer composition, and fit to a 1:2 interaction model using Tracedrawer 1.8 software.

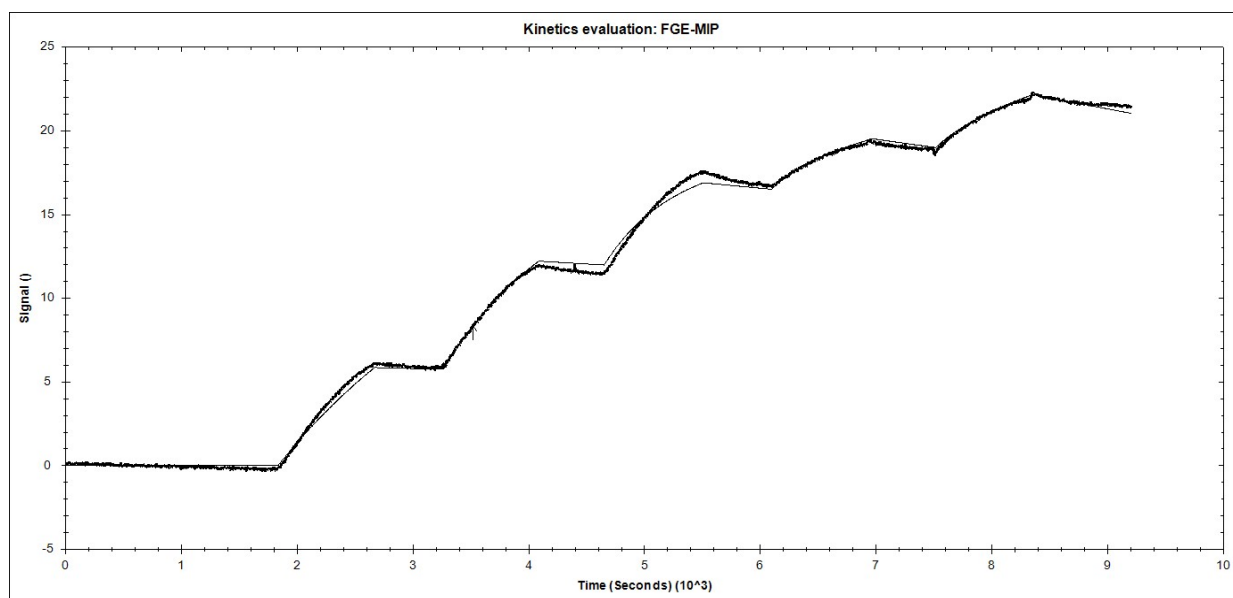

**Fig. S8.** SPR sensorgrams showing response of FGE-MIPs to injections of different concentrations of AChE. A kinetic titration injection strategy was employed for these experiments due to the difficulty of surface regeneration. AChE was injected at 5 different concentrations from 0.1 nM to 1  $\mu$ M and allowed to associate and dissociate for 14 min and 5 min respectively, before a final dissociation of 120 min (not shown). All data were reference subtracted against a control polymer of the same monomer composition, and fit to a 1:2 interaction model using Tracedrawer 1.8 software.



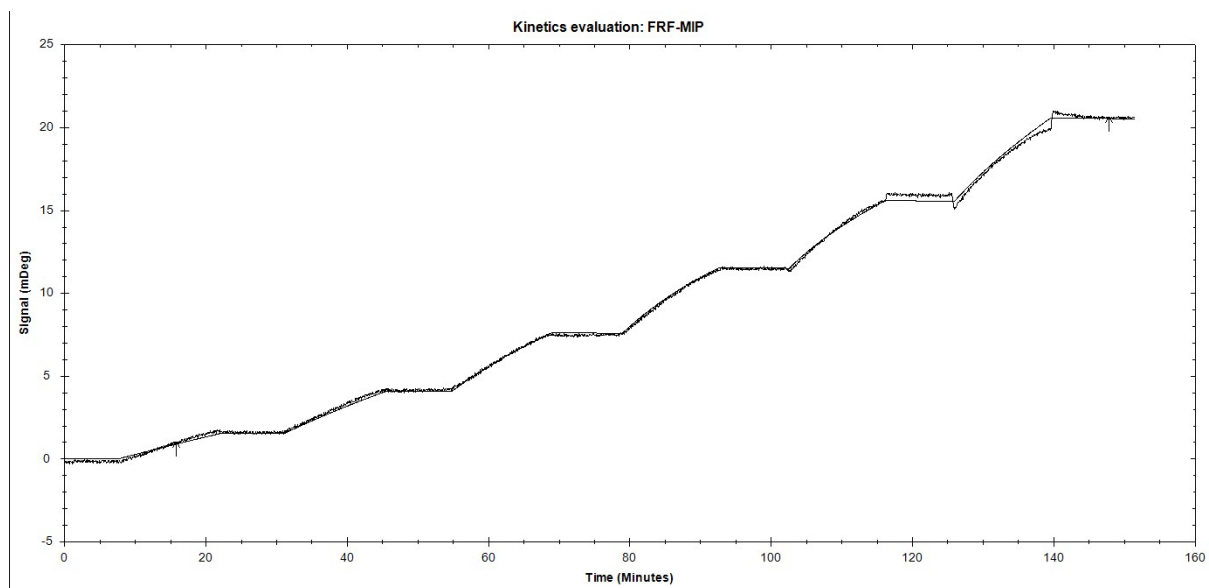

**Fig. S9.** SPR sensorgrams showing response of FRF-MIPs to injections of different concentrations of AChE. A kinetic titration injection strategy was employed for these experiments due to the difficulty of surface regeneration. AChE was injected at 5 different concentrations from 0.1 nM to 1  $\mu$ M and allowed to associate and dissociate for 14 min and 5 min respectively, before a final dissociation of 120 min (not shown). All data were reference subtracted against a control polymer of the same monomer composition, and fit to a 1:2 interaction model using Tracedrawer 1.8 software.

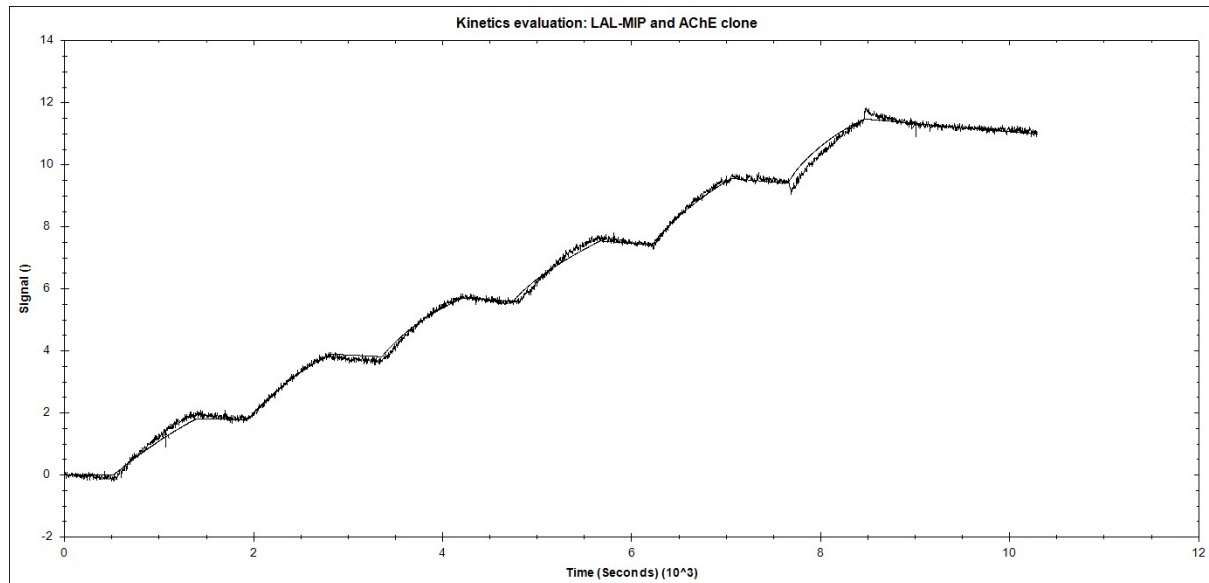

**Fig. S10.** SPR sensorgrams showing response of LAL-MIPs to injections of different concentrations of AChE. A kinetic titration injection strategy was employed for these experiments due to the difficulty of surface regeneration. AChE was injected at 5 different concentrations from 0.1 nM to 1  $\mu$ M and allowed to associate and dissociate for 14 min and 5 min respectively, before a final dissociation of 120 min (not shown). All data were reference subtracted against a control polymer of the same monomer composition, and fit to a 1:2 interaction model using Tracedrawer 1.8 software.

**Table S2.** Affinity coefficient ( $K_D$ ) of the synthesized MIP nanoparticles upon interaction with EeAChE enzyme measured using SPR.

| Epitope used as template              | $K_D$ , nM | $\text{Chi}^2$ |
|---------------------------------------|------------|----------------|
| YWANFAR (YWA-MIP)                     | 12.0       | 4.03           |
| QVTIFGESAGAASVGM-HLLSPDSRPK (FGE-MIP) | 78.6       | 0.06           |
| FRFSFVPV (FRF-MIP)                    | 0.40       | 0.03           |
| LALQWVQDNIHFFGGNPK (LAL-MIP)          | 2.20       | 0.02           |

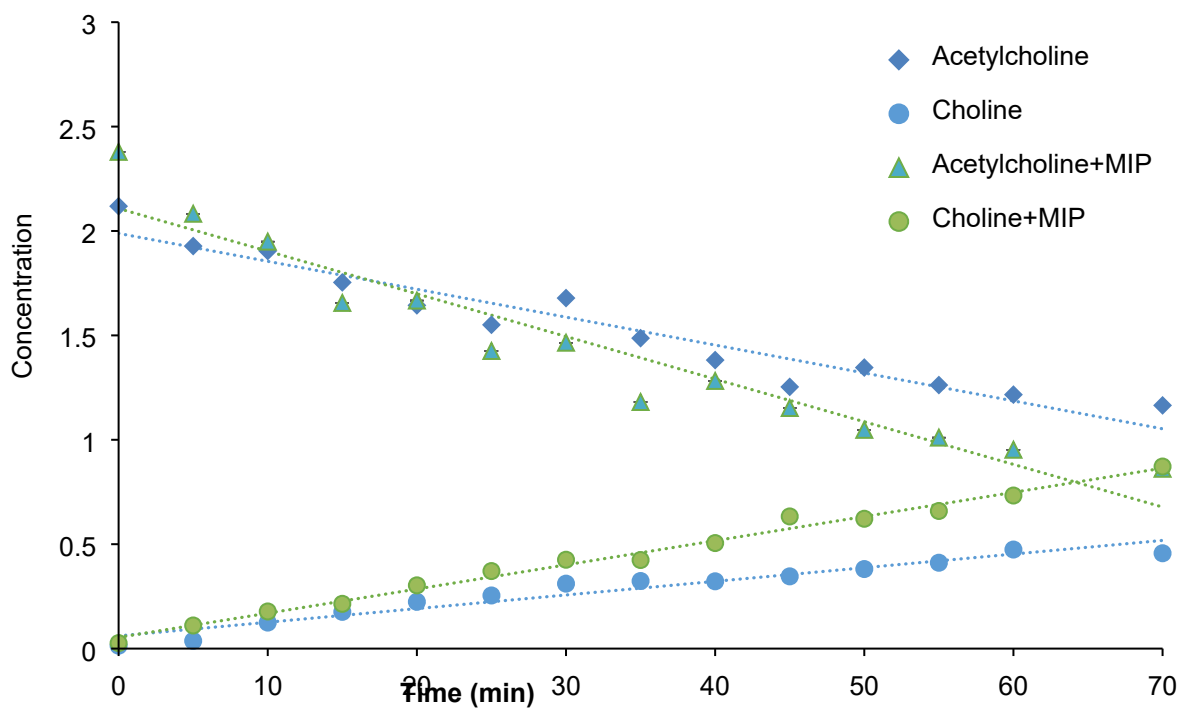

**Fig. S11.** Direct measure of substrate conversion by enzyme alone and in the presence of FRF-MIP.

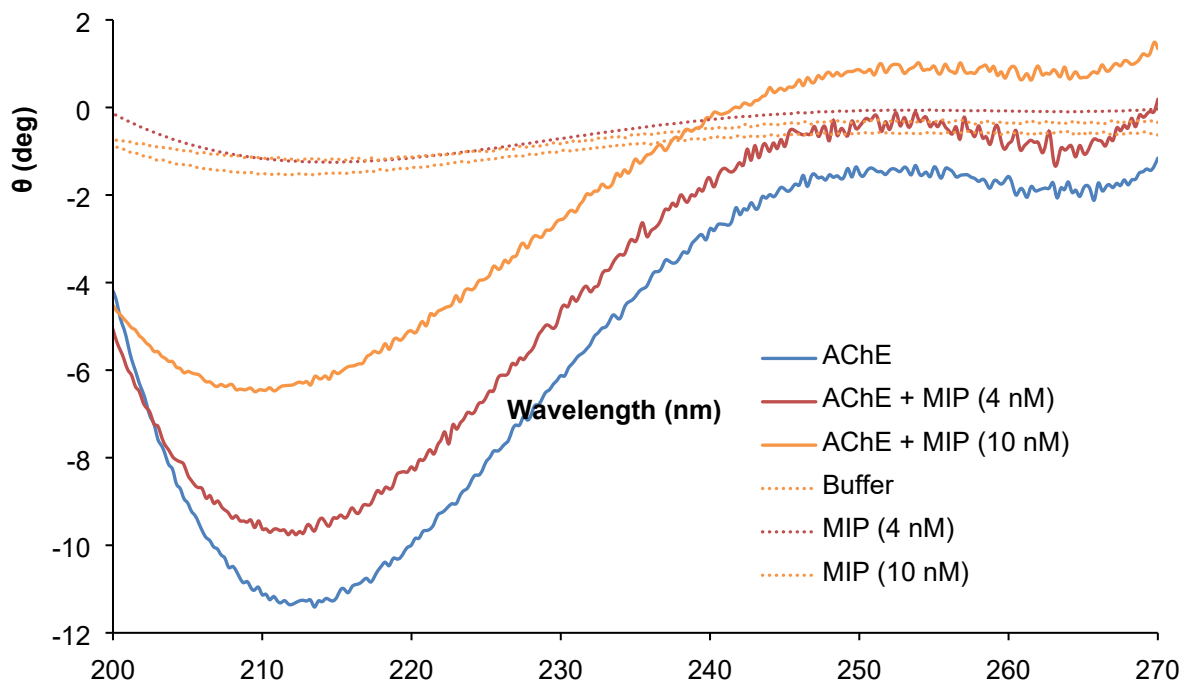

**Fig. S12.** Circular dichroism spectra of AChE with increasing concentration of YWA-MIP. Dashed lines correspond to control measurements of MIP without protein. Note that the nanoMIP materials appear to be inert spectroscopically.

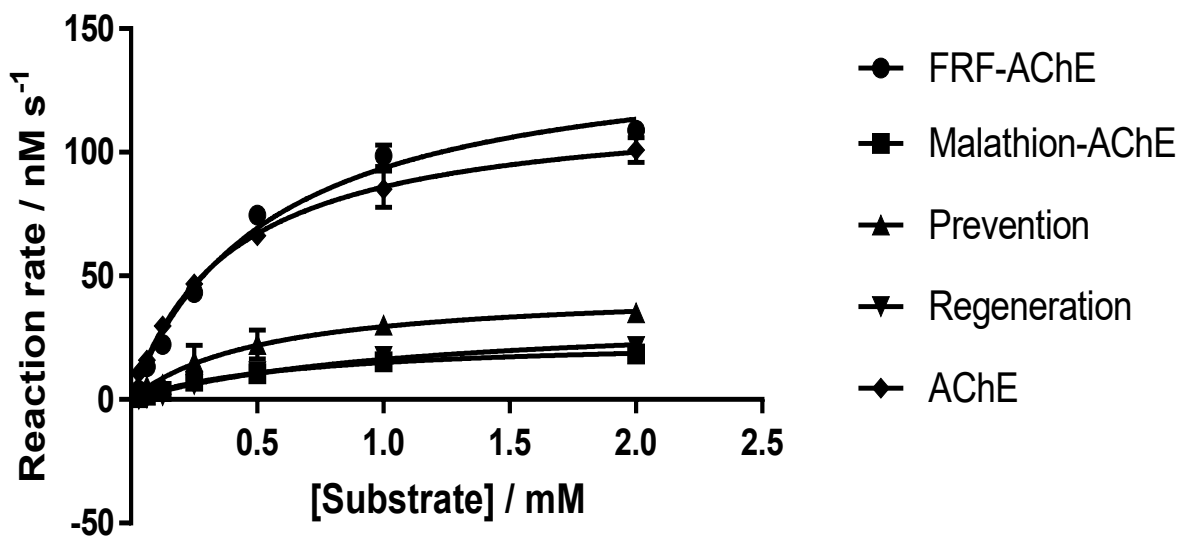

**Fig. S13.** Michaelis-Menten plot obtained for FRF-MIP. Error bars indicate SD. N=3

**Table S3.** Values obtained from Michaelis-Menten plot for FRF-MIP.

|                                    | <b>FRF-MIP- AChE</b> | <b>Malathion-<br/>AChE</b> | <b>Prevention</b> | <b>Regeneration</b> | <b>AChE</b>      |
|------------------------------------|----------------------|----------------------------|-------------------|---------------------|------------------|
| <b>Michaelis-Menten</b>            |                      |                            |                   |                     |                  |
| <b>Best-fit values</b>             |                      |                            |                   |                     |                  |
| <b>Vmax</b>                        | 143.9                | 25.01                      | 45.12             | 34.92               | 119.7            |
| <b>Km</b>                          | 0.5378               | 0.674                      | 0.5301            | 1.147               | 0.3928           |
| <b>Std. Error</b>                  |                      |                            |                   |                     |                  |
| <b>Vmax</b>                        | 6.829                | 1.315                      | 4.506             | 4.047               | 3.342            |
| <b>Km</b>                          | 0.06444              | 0.08344                    | 0.1343            | 0.2637              | 0.03039          |
| <b>95% CI (profile likelihood)</b> |                      |                            |                   |                     |                  |
| <b>Vmax</b>                        | 130.8 to 159.4       | 22.45 to 28.15             | 36.93 to 57.09    | 28.23 to 45.9       | 112.7 to 127.5   |
| <b>Km</b>                          | 0.4222 to 0.6895     | 0.5203 to 0.8828           | 0.3127 to 0.9282  | 0.7399 to 1.902     | 0.3313 to 0.4664 |
| <b>Goodness of Fit</b>             |                      |                            |                   |                     |                  |
| <b>Degrees of Freedom</b>          | 12                   | 12                         | 12                | 12                  | 12               |
| <b>R square</b>                    | 0.9863               | 0.9867                     | 0.9372            | 0.9714              | 0.9924           |
| <b>Absolute Sum of Squares</b>     | 295.1                | 7.575                      | 131.4             | 25.55               | 110.8            |
| <b>Sy. x</b>                       | 4.959                | 0.7945                     | 3.309             | 1.459               | 3.038            |
| <b>Constraints</b>                 |                      |                            |                   |                     |                  |
| <b>Km</b>                          | Km > 0               | Km > 0                     | Km > 0            | Km > 0              | Km > 0           |
| <b>Number of points</b>            |                      |                            |                   |                     |                  |
| <b># of X values</b>               | 14                   | 14                         | 14                | 14                  | 14               |
| <b># Y values analyzed</b>         | 14                   | 14                         | 14                | 14                  | 14               |
